# Supplementary material for: Physiological TLR4 regulation in human fetal membranes as an explicative mechanism of a pathological preterm case
Source: eLife. 2022 Feb 4;11:e71521. doi: 10.7554/eLife.71521 (PMC8816379; doi:10.7554/eLife.71521)
Supplement: Figure 4—source data 1. [file elife-71521-fig4-data1.xlsx]

## Sheet: B_value figure 4A
cg02515422			cg05429895			cg13730105			cg14629571			cg14605396
Amnion	Choriodecidua		Amnion	Choriodecidua		Amnion	Choriodecidua		Amnion	Choriodecidua		Amnion	Choriodecidua
0.476137	0.0613045		0.644464	0.276933		0.642224	0.102649		0.904701	0.675651		0.590759	0.376905
0.3519	0.0876636		0.608805	0.218757		0.547404	0.147672		0.898175	0.58726		0.598912	0.350358
0.480226	0.0938556		0.662071	0.124062		0.668803	0.0929454		0.862232	0.537946		0.530435	0.290033
0.407874	0.0767305		0.587953	0.144962		0.615923	0.114892		0.891061	0.547952		0.519324	0.295372
0.431408	0.034034		0.626688	0.114014		0.619332	0.168754		0.908022	0.733608		0.523936	0.425106
0.309386	0.114266		0.473582	0.317441		0.386863	0.159325		0.793923	0.576053		0.474959	0.289143
0.515009	0.121775		0.678118	0.0895182		0.599294	0.0735709		0.907358	0.519144		0.67936	0.284286
0.519183	0.111664		0.65698	0.257507		0.770252	0.0901713		0.901198	0.759394		0.619045	0.430588
0.49793	0.0834245		0.657226	0.23411		0.605344	0.0685287		0.907625	0.683059		0.59526	0.418663

## Sheet: Statistics
figure 4A
cg Number	Test	Comparison	p-value
cg02515422	Wilcoxon matched-pairs signed rank test	Choriodecidua	0.0039	**
		vs,
		Amnion
cg05429895	Wilcoxon matched-pairs signed rank test	Choriodecidua	0.0039	**
		vs,
		Amnion
cg13730105	Wilcoxon matched-pairs signed rank test	Choriodecidua	0.0039	**
		vs,
		Amnion
cg14629571	Wilcoxon matched-pairs signed rank test	Choriodecidua	0.0039	**
		vs,
		Amnion
cg14605396	Wilcoxon matched-pairs signed rank test	Choriodecidua	0.0039	**
		vs,
		Amnion
qPCR figure 4C
WB figure 4C
