# Supplementary material for: Physiological TLR4 regulation in human fetal membranes as an explicative mechanism of a pathological preterm case
Source: eLife. 2022 Feb 4;11:e71521. doi: 10.7554/eLife.71521 (PMC8816379; doi:10.7554/eLife.71521)
Supplement: Figure 4—source data 3. [file elife-71521-fig4-data3.xlsx]

## Sheet: qRT-PCR TLR4 Fig 4C
Amnion	Choriodecidua
9.25e-05	0.00232
0.000369	0.00592
1.7e-05	0.00675
0.000147	0.00376
1.89e-05	0.00576
0.00125	0.000299
2.86e-05	0.00199
2.06e-05	0.000271
0.000149	0.00975

## Sheet: WB TLR4 Fig 4D
Amnion	Choriodecidua
0.183819	0.0880283
0.285703	0.627534
0.117196	0.695856
0.261672	0.326809
0.148628	0.150061
0.179161	1.02806
0.0846218	0.600101
0.148361	0.992923
0.0993226	0.123921

## Sheet: Statistics
qRT-PCR
Test	comparison	p-value
Wilcoxon matched-pairs signed rank test	Choriodecidua	0.0117	*
	vs,
	Amnion
WB
Test	comparison	p-value
Wilcoxon matched-pairs signed rank test	Choriodecidua	0.0273	*
	vs,
	Amnion
