# Supplementary material for: Physiological TLR4 regulation in human fetal membranes as an explicative mechanism of a pathological preterm case
Source: eLife. 2022 Feb 4;11:e71521. doi: 10.7554/eLife.71521 (PMC8816379; doi:10.7554/eLife.71521)
Supplement: Figure 5—source data 1. [file elife-71521-fig5-data1.xlsx]

## Sheet: B-value-miR-Figure 5B
cg07685357			cg24603444			cg20475322			cg06749053			cg24150623			cg07281370
Amnion	Choriodecidua		Amnion	Choriodecidua		Amnion	Choriodecidua		Amnion	Choriodecidua		Amnion	Choriodecidua		Amnion	Choriodecidua
0.238704	0.493752		0.188651	0.550702		0.20496	0.686059		0.243916	0.613906		0.0721865	0.617878		0.609781	0.589705
0.218161	0.489511		0.10427	0.563999		0.173983	0.704497		0.169274	0.645381		0.076348	0.599556		0.553563	0.542165
0.232917	0.415559		0.149393	0.632225		0.18755	0.83734		0.208257	0.742302		0.0818151	0.781259		0.589735	0.737472
0.22935	0.286286		0.118877	0.546622		0.160178	0.674259		0.168031	0.639485		0.113642	0.61013		0.531616	0.619507
0.286853	0.369289		0.133567	0.2892		0.182936	0.36848		0.187286	0.340433		0.0848995	0.342006		0.66339	0.510852
0.329336	0.494346		0.403256	0.606926		0.479727	0.677401		0.46529	0.675977		0.391197	0.702361		0.61273	0.615087
0.292731	0.30764		0.160922	0.411762		0.221295	0.523445		0.212495	0.487425		0.122068	0.378946		0.558864	0.39136
0.371501	0.544311		0.267849	0.575795		0.280978	0.757444		0.248058	0.761176		0.174661	0.721661		0.460269	0.648867
0.343951	0.395324		0.214924	0.457372		0.235959	0.598949		0.217384	0.566499		0.167964	0.432096		0.513395	0.442336
cg03649143
Amnion	Choriodecidua
0.516738	0.827579
0.761683	0.802037
0.551089	0.598455
0.36962	0.665373
0.338035	0.739887
0.319812	0.660235
0.291542	0.704172
0.267392	0.730245
0.306724	0.799963

## Sheet: Statistics
MIR125B1
cg number	Test	Comparison	p-value
cg07685357	Wilcoxon matched-pairs signed rank test	Choriodecidua	0.0039	**
		vs,
		Amnion
cg24603444	Wilcoxon matched-pairs signed rank test	Choriodecidua	0.0039	**
		vs,
		Amnion
cg20475322	Wilcoxon matched-pairs signed rank test	Choriodecidua	0.0039	**
		vs,
		Amnion
cg06749053	Wilcoxon matched-pairs signed rank test	Choriodecidua	0.0039	**
		vs,
		Amnion
cg24150623	Wilcoxon matched-pairs signed rank test	Choriodecidua	0.0039	**
		vs,
		Amnion
cg07281370	Wilcoxon matched-pairs signed rank test	Choriodecidua	0.9102	NS
		vs,
		Amnion
LET7A2
cg number	Test	Comparison	p-value
cg03649143	Wilcoxon matched-pairs signed rank test	Choriodecidua	0.0039	**
		vs,
		Amnion
