# Supplementary material for: Physiological TLR4 regulation in human fetal membranes as an explicative mechanism of a pathological preterm case
Source: eLife. 2022 Feb 4;11:e71521. doi: 10.7554/eLife.71521 (PMC8816379; doi:10.7554/eLife.71521)
Supplement: Figure 5—source data 2. [file elife-71521-fig5-data2.xlsx]

## Sheet: qRT-PCR pri-miR Figure 5C
pri-miRNA-125b-1			pri-let-7a-2
Amnion	Choriodecidua		Amnion	Choriodecidua
0.00431	0.000675		0.000233	ND
0.0104	0.0015		0.000712	ND
0.00723	0.00194		0.000287	ND
0.0039	0.0007		0.000284	ND
0.00765	0.00338		0.000166	ND
0.000725	0.000272
0.000629	0.000733
0.000846	0.00136
0.00227	0.000215

## Sheet: Statistics
Test	Comparison	p-value
Wilcoxon matched-pairs signed rank test	Choriodecidua	0.0273	*
	vs,
	Amnion
