# Supplementary material for: Physiological TLR4 regulation in human fetal membranes as an explicative mechanism of a pathological preterm case
Source: eLife. 2022 Feb 4;11:e71521. doi: 10.7554/eLife.71521 (PMC8816379; doi:10.7554/eLife.71521)
Supplement: Figure 6—source data 1. [file elife-71521-fig6-data1.xlsx]

## Sheet: Luciferase tests-Figure 6A
pMIR-3'UTR TLR4-luc	pMIR-3'UTR TLR4-luc+let-7a-2	pMIR-3'UTR TLR4-luc+miR-125b-1
1.105	0.501	0.65
0.895	0.592	0.573
0.983	0.761	0.58
0.967	0.583	0.453
0.951	0.565	0.525

## Sheet: Statistics
Test	Comparison	adjust p-value
Kruskal-Wallis test	all	0.0018	**
Dunn's multiple comparisons test	pMIR-3'UTR TLR4-luc vs. pMIR-3'UTR TLR4-luc+let-7a-2	0.0486	*
Dunn's multiple comparisons test	pMIR-3'UTR TLR4-luc vs. pMIR-3'UTR TLR4-luc+miR-125b-1	0.0112	*
