# Supplementary material for: Physiological TLR4 regulation in human fetal membranes as an explicative mechanism of a pathological preterm case
Source: eLife. 2022 Feb 4;11:e71521. doi: 10.7554/eLife.71521 (PMC8816379; doi:10.7554/eLife.71521)
Supplement: Figure 6—source data 2. [file elife-71521-fig6-data2.xlsx]

## Sheet: RT-qPCR TLR4-Figure 6B
HEK 293	Primary Amniocytes	FL	WISH	AV3
4.12e-08	1.1e-05	0.0004	0.000484	0.00443
4.07e-07	2.12e-05	0.000455	0.000476	0.00348
9e-08	7.11e-06	0.00079	0.000663	0.00397
3.38e-07	1.04e-05	0.000415	0.000615	0.00411
6.26e-07	9.52e-06	0.000553	0.000465	0.00483
5.16e-07	6.28e-06	0.000424	0.000762	0.005
