# Supplementary material for: Physiological TLR4 regulation in human fetal membranes as an explicative mechanism of a pathological preterm case
Source: eLife. 2022 Feb 4;11:e71521. doi: 10.7554/eLife.71521 (PMC8816379; doi:10.7554/eLife.71521)
Supplement: Figure 6—source data 3. [file elife-71521-fig6-data3.xlsx]

## Sheet: AV3-figure 6C
qPCR							protéines
12h							24h
pCMV	let-7a-2	miR-125b-1	let-7a-2+miR-125b-1				pCMV	let-7a-2	miR-125b-1	let-7a-2+miR-125b-1
1	0.071	0.0191	0.0258				1	0.75	0.846	0.264
1	0.0619	0.0191	0.0254				1	0.592	1.14	0.545
1	0.546	0.111	0.215				1	0.782	1.93	1.01
1	0.688	0.221	0.0736				1	0.102	1.285	0.655
1	0.218	0.0732	0.0773				1	0.13	0.673	1.09
1	0.165	0.0736	0.133				1	0.5316	1.158	0.6839
1	0.523	0.517	0.161				1	0.4813	1.172	0.708
1	0.93	0.0647	0.0342
1	0.315	1.02	1.16
1	0.116	0.678	1.3
24h							48h
pCMV	let-7a-2	miR-125b-1	let-7a-2+miR-125b-1				pCMV	let-7a-2	miR-125b-1	let-7a-2+miR-125b-1
1	0.0984	1.63	0.386				1	0.646	0.356	0.33
1	0.0243	1.73	0.552				1	0.498	0.463	0.379
1	0.747	0.725	1.65				1	1.111	1.171	0.303
1	0.933	0.602	1.67				1	0.119	0.393	0.895
1	0.506	0.999	0.788				1	0.527	0.147	0.533
1	0.271	0.451	0.74				1	0.527	0.393	0.379
1	0.928	0.729	2.15				1	0.5713	0.4872	0.4698
1	0.95	0.656	1.43

## Sheet: Statistics
qPCR					protéines
12h					24h
Test	Comparison	p-value			Test	Comparison	p-value
Kruskal-Wallis test	all	0.0022	**		Kruskal-Wallis test	all	0.002	**
Dunn's multiple comparisons test	pCMV vs. let-7a-2	0.0443	*		Dunn's multiple comparisons test	pCMV vs. let-7a-2	0.0418	*
Dunn's multiple comparisons test	pCMV vs. miR-125b-1	0.0041	**		Dunn's multiple comparisons test	pCMV vs. miR-125b-1	>0,9999
Dunn's multiple comparisons test	pCMV vs. let-7a-2+miR-125b-1	0.0113	*		Dunn's multiple comparisons test	pCMV vs. let-7a-2+miR-125b-1	0.8607
Dunn's multiple comparisons test	let-7a-2 vs. miR-125b-1	>0,9999			Dunn's multiple comparisons test	let-7a-2 vs. miR-125b-1	0.0024	**
Dunn's multiple comparisons test	let-7a-2 vs. let-7a-2+miR-125b-1	>0,9999			Dunn's multiple comparisons test	let-7a-2 vs. let-7a-2+miR-125b-1	>0,9999
Dunn's multiple comparisons test	miR-125b-1 vs. let-7a-2+miR-125b-1	>0,9999			Dunn's multiple comparisons test	miR-125b-1 vs. let-7a-2+miR-125b-1	0.1259
24h					48h
Test	Comparison	p-value			Test	Comparison	p-value
Kruskal-Wallis test	all	0.0268	*		Kruskal-Wallis test	all	0.0082	**
Dunn's multiple comparisons test	pCMV vs. let-7a-2	0.0258	*		Dunn's multiple comparisons test	pCMV vs. let-7a-2	0.4119
Dunn's multiple comparisons test	pCMV vs. miR-125b-1	0.6566			Dunn's multiple comparisons test	pCMV vs. miR-125b-1	0.0281	*
Dunn's multiple comparisons test	pCMV vs. let-7a-2+miR-125b-1	>0,9999			Dunn's multiple comparisons test	pCMV vs. let-7a-2+miR-125b-1	0.0121	*
Dunn's multiple comparisons test	let-7a-2 vs. miR-125b-1	>0,9999			Dunn's multiple comparisons test	let-7a-2 vs. miR-125b-1	>0,9999
Dunn's multiple comparisons test	let-7a-2 vs. let-7a-2+miR-125b-1	0.1721			Dunn's multiple comparisons test	let-7a-2 vs. let-7a-2+miR-125b-1	>0,9999
Dunn's multiple comparisons test	miR-125b-1 vs. let-7a-2+miR-125b-1	>0,9999			Dunn's multiple comparisons test	miR-125b-1 vs. let-7a-2+miR-125b-1	>0,9999
