# Supplementary material for: Physiological TLR4 regulation in human fetal membranes as an explicative mechanism of a pathological preterm case
Source: eLife. 2022 Feb 4;11:e71521. doi: 10.7554/eLife.71521 (PMC8816379; doi:10.7554/eLife.71521)
Supplement: Figure 6—source data 4. [file elife-71521-fig6-data4.xlsx]

## Sheet: Amniocytes-Figure 6D
qPCR						WB
pCMV	let-7a-2	miR-125b-1	let-7a-2+miR-125b-1			pCMV	let-7a-2	miR-125b-1	let-7a-2+miR-125b-1
1	0.898	0.447	0.245			1	0.599	0.293	0.382
1	0.531	0.595	0.266			1	0.656	0.772	0.689
1	0.903	0.734	0.585			1	0.516	0.585	0.463
1	0.466	0.159	0.443			1	0.793	0.898	0.211
1	1.07	0.704	0.997			1	0.778	0.875	0.758
1	0.652	0.499	0.728			1	0.701	0.467
1	1.41	0.759	0.928			1	0.834	0.29
1	0.853	0.629

## Sheet: Statistics
qPCR
Test	Comparison	p-value
Kruskal-Wallis test	all	0.0015	**
Dunn's multiple comparisons test	pCMV vs. let-7a-2	0.4971
Dunn's multiple comparisons test	pCMV vs. miR-125b-1	0.0031	**
Dunn's multiple comparisons test	pCMV vs. let-7a-2+miR-125b-1	0.0081	**
Dunn's multiple comparisons test	let-7a-2 vs. miR-125b-1	0.4971
Dunn's multiple comparisons test	let-7a-2 vs. let-7a-2+miR-125b-1	0.7543
Dunn's multiple comparisons test	miR-125b-1 vs. let-7a-2+miR-125b-1	>0,9999
WB
Test	Comparison	p-value
Kruskal-Wallis test	all	0.0009	***
Dunn's multiple comparisons test	pCMV vs. let-7a-2	0.0488	*
Dunn's multiple comparisons test	pCMV vs. miR-125b-1	0.0079	**
Dunn's multiple comparisons test	pCMV vs. let-7a-2+miR-125b-1	0.0016	**
Dunn's multiple comparisons test	let-7a-2 vs. miR-125b-1	>0,9999
Dunn's multiple comparisons test	let-7a-2 vs. let-7a-2+miR-125b-1	>0,9999
Dunn's multiple comparisons test	miR-125b-1 vs. let-7a-2+miR-125b-1	>0,9999
