# Supplementary material for: Physiological TLR4 regulation in human fetal membranes as an explicative mechanism of a pathological preterm case
Source: eLife. 2022 Feb 4;11:e71521. doi: 10.7554/eLife.71521 (PMC8816379; doi:10.7554/eLife.71521)
Supplement: Supplementary file 1. [file elife-71521-supp1.docx]

**Supplementary file 1a :**

**Perinatal characteristics of the enrolled patients.**

| **Perinatal characteristics** | **n=9** |
| --- | --- |
| **Maternal Age (years)** | 32.33 ± 1.76 |
| **Gestational age at delivery (**Amenorrhea weeks) | 39.10 ± 0.08 |
| **Body Mass Index, BMI** | 23.75 ± 0.95 |
| **Child sexe** | 5F, 4M |
| **Birth weight (g)** | 3351 ± 129 |

**Supplementary file 1b:**

**Primer sequences used for the PCR.**

| **Human Gene** | **Sequence (5’🡪3’)** | **Product length (bp)** | **NCBI**  **Reference** |
| --- | --- | --- | --- |
| hTLR4-S | ACCAAGAACCTGGACCTGAG | 181 | NM_138554 |
| hTLR4-A | TCTGGATGGGGTTTCCTGTC |
| hRPLP0-S | AGGCTTTAGGTATCACCACT | 219 | NM_053275 |
| hRPLP0-A | GCAGAGTTTCCTCTGTGATA |
| hRPS17-S | TGCGAGGAGATCGCCATTATC | 170 | NM_001021 |
| hRPS17-A | AAGGCTGAGACCTCAGGAAC |
| hpri-125B1-S | CGAACAGAAATTGCCTGTCATTC | 175 | [NR_029671](http://www.ncbi.nlm.nih.gov/nuccore/NR_029671) |
| hpri-125B1-A | TTCCACCAAATTTCCAGGATGC |
| hpri-LET7A2-S | AGACTAACTTGTAATTTCCCTGC | 190 | [NR_029477](http://www.ncbi.nlm.nih.gov/nuccore/NR_029477) |
| hpri-LET7A2-A | AGGCCTGGAGGAATCATGATC |
| hpri-LET7A1-S | TTCCTGTGGTGCTCAACTGTG | 200 | NR_029476 |
| hpri-LET7A1-A | TGTACAATTAGTTAACTGACTTTC |

**Supplementary file 1c:**

**List of specific genes extracted from ZAM zone after a transcriptomic analysis**

| **log2 FC<2.8**   | A2M | | --- | | AADAC | | ABCA1 | | ABP1 | | ACVRL1 | | ADA | | ADAM12 | | ADAM19 | | ADAMTS1 | | ADAMTS4 | | ADAMTS5 | | ADAMTS8 | | ADCY1 | | AGT | | AKAP12 | | ALDH2 | | AMIGO2 | | AMZ1 | | ANKRD1 | | ANTXR1 | | APOA1 | | APOBEC2 | | APOC1 | | APOE | | AQPEP | | AR | | ARG1 | | ASPHD2 | | ASS1 | | ATP13A4 | | AXDND1 | | BCAR4 | | BCORL1 | | BIN2 | | BMP8A | | C11orf20 | | C11orf86 | | C12orf42 | | C15orf48 | | C1orf115 | | C1orf130 | | C1QTNF1 | | C2CD4B | | C2orf72 | | C4BPB | | C4orf26 | | C5orf46 | | C7orf58 | | C8orf31 | | CABLES1 | | CACNA1A | | CACNA1C | | CCNO | | CD248 | | CD302 | | CD52 | | CDA | | CDCA7 | | CDH16 | | CDO1 | | CEACAM1 | | CEACAM3 | | CEBPA | | CFHR3 | | CHST2 | | CILP2 | | CKMT2 | | CLDN19 | | CNR1 | | COL14A1 | | COL27A1 | | CORO2A | | COTL1 | | CPE | | CPZ | | CSF2RB | | CSH1 | | CSH2 | | CSHL1 | | CSRP2 | | CTAG1A | | CTNND2 | | CTSH | | CTSL1 | | CTSL1P8 | | CXCL12 | | CXCL14 | | CXCR6 | | CYP11A1 | | CYP26A1 | | CYP4B1 | | DAB2IP | | DENND2A | | DFNA5 | | DHRS3 | | DIO2 | | DIRC3 | | DISC1 | | DLK2 | | DLL1 | | DLX4 | | DLX5 | | DLX6 | | DNAJC6 | | DOCK4 | | DPP6 | | DSCR8 | | DZIP1 | | E2F2 | | EBF1 | | EBI3 | | ECM2 | | EDNRB | | EEPD1 | | EFHD1 | | EFNB1 | | ELTD1 | | ENG | | ENTPD2 | | ENTPD3 | | ENTPD8 | | EPHB2 | | ERVMER34-1 | | ESAM | | ESR1 | | ESYT3 | | EXOC3L4 | | FA2H | | FABP7 | | FADS1 | | FADS3 | | FAM105A | | FAM153A | | FAM153B | | FAM43A | | FAM78A | | FAM83D | | FBLN1 | | FBXL16 | | FBXO32 | | FGF2 | | FGFBP1 | | FGFR2 | | FHOD3 | | FIGNL2 | | FILIP1L | | FLJ13744 | | FLJ16779 | | FLJ30901 | | FLJ31356 | | FLJ43663 | | FLT1 | | FOLR1 | | FOXO1 | | GCM1 | | GDA | | GDF15 | | GDNF | | GDPD3 | | GEM | | GH1 | | GJC1 | | GJD3 | | GKN1 | | GLDC | | GLIPR1 | | GNLY | | GPC4 | | GPR116 | | GPR32 | | GPR78 | | GPX3 | | GRIK2 | | GTSF1 | | GYLTL1B | | HAS3 | | HERC6 | | HES2 | | HEXB | | HEY1 | | HJURP | | HMGB3 | | HMGB3P1 | | HMHA1 | | HN1 | | HOXA11 | | HOXA7 | | HPCAL1 | | HPGD | | HS3ST2 | | HS6ST1 | | HSD3B1 | | HSPA12B | | HTRA4 | | HYAL4 | | ICAM2 | | IGDCC3 | | IGSF23 | | IL13RA2 | | IL15 | | IL17D | | IL18BP | | IL18R1 | | IL1RAP | | IL1RL1 | | IL20RB | | IL2RB | | IL33 | | IL6ST | | INHA | | INHBA | | ISM2 | | ITGA1 | | ITGAD | | ITGB3 | | ITLN1 | | ITLN2 | | JAM2 | | JAZF1 | | KAL1 | | KCNA4 | | KCNJ16 | | KCNJ2 | | KCNK12 | | KIAA1324 | | KIF21A | | KISS1R | | KITLG | | KLHL5 | | KLK3 | | KLRC1 | | KLRC4 | | KLRG2 | | KRT37 | | LAIR2 | | LAMB1 | | LAMB4 | | LDLR | | LGALS14 | | LGSN | | LIFR | | LIMS3L | | LIN28B | | LINC00162 | | LINC00221 | | LINC00473 | | LINGO2 | | LIPG | | LITAF | | LOC100128098 | | LOC100130111 | | LOC100132735 | | LOC100302650 | | LOC100505495 | | LOC100506328 | | LOC100506580 | | LOC100506783 | | LOC100507033 | | LOC100507140 | | LOC100507351 | | LOC100507410 | | LOC100507566 | | LOC100507639 | | LOC100509091 | | LOC100509498 | | LOC100652823 | | LOC144817 | | LOC145820 | | LOC219731 | | LOC283404 | | LOC284561 | | LOC339524 | | LOC340340 | | LOC388242 | | LOC388630 | | LOC389634 | | LOC644366 | | LOC644686 | | LOC645722 | | LOC650226 | | LOC729178 | | LOC729680 | | LUM | | MAGEA8 | | MAPT | | MARC1 | | MCAM | | MFAP3L | | MFSD2A | | MGAT5B | | MGP | | MGST1 | | MIAT | | MIR205HG | | MLC1 | | MMP11 | | MMP7 | | MPDZ | | MYCL1 | | MYO16 | | NAV3 | | NBLA00301 | | NDC80 | | NFASC | | NFE2L3 | | NIM1 | | NKD2 | | NKG7 | | NLGN4X | | NLGN4Y | | NLRP7 | | NOTUM | | NRCAM | | NRIP1 | | NTN1 | | NTN4 | | OGDHL | | OLR1 | | OOEP | | OSR2 | | OXGR1 | | PAGE4 | | PALM3 | | PAPLN | | PAPPA | | PAPPA2 | | PAPSS2 | | PARD6G | | PARM1 | | PCDHB10 | | PCDHB9 | | PCOLCE2 | | PDCD1LG2 | | PDE6H | | PDE8B | | PDGFRL | | PDZD2 | | PDZK1IP1 | | PGF | | PKN1 | | PLA2G7 | | PLA2R1 | | PLAC8 | | PLCE1 | | PLEKHH2 | | PLIN1 | | PLXDC1 | | PNMAL1 | | PNPLA3 | | POLR1C | | PPAP2A | | PPAPDC3 | | PPARG | | PPP4R4 | | PRB3 | | PRDM1 | | PRG2 | | PRKCE | | PROK1 | | PROS1 | | PSG1 | | PSG10P | | PSG2 | | PSG3 | | PSG5 | | PSG6 | | PSG8 | | PTGDS | | PTGER3 | | PTN | | PTPN13 | | PVR | | Q6TXI9 | | RAB15 | | RAB3B | | RASGRF2 | | RASL11B | | RBM47 | | RBPMS | | REN | | REPS2 | | RGN | | RGPD1 | | RGS16 | | RNF150 | | RRAD | | S100P | | SCARB1 | | SCGB1D1 | | SCUBE1 | | SCUBE2 | | SEMA5B | | SERPINB11 | | SERPINB9 | | SFRP1 | | SH3BP4 | | SH3BP5 | | SLC16A6 | | SLC22A18AS | | SLC25A15 | | SLC44A5 | | SLC4A7 | | SLC6A2 | | SLC6A4 | | SLCO2A1 | | SNAI1 | | SNORD115-1 | | SNORD115-23 | | SNORD115-32 | | SNORD115-4 | | SNX10 | | SOAT1 | | SOD3 | | SOHLH2 | | SORBS1 | | SPATA22 | | SPDYE5 | | SPINK5 | | SPOCD1 | | SPRR2G | | SRPX | | SSH2 | | ST3GAL5 | | ST8SIA1 | | STAB2 | | STON1-GTF2A1L | | STRA6 | | SULF1 | | SULF2 | | SUN3 | | SV2B | | SYN3 | | SYNPO | | SYNPO2L | | SYT12 | | TAC3 | | TBC1D4 | | TCF7L1 | | TCF7L2 | | TIMP4 | | TKTL1 | | TLE2 | | TLE6 | | TLR4 | | TM4SF5 | | TMEM108 | | TMEM132B | | TMEM204 | | TMEM59L | | TNFAIP2 | | TNFSF10 | | TPRXL | | TPST1 | | TRH | | TRIM14 | | TRIM64 | | TSKU | | TSNARE1 | | TSPAN5 | | TSPAN8 | | TTR | | UBD | | UCHL1 | | VAV3 | | VIPR2 | | VIT | | VWCE | | WDR86 | | WNK2 | | WNT10B | | WNT6 | | XAGE3 | | XAGE5 | | XLOC_001595 | | XLOC_003286 | | XLOC_003595 | | XLOC_006705 | | XLOC_006781 | | XLOC_007052 | | XLOC_007358 | | XLOC_007370 | | XLOC_007689 | | XLOC_007875 | | XLOC_008696 | | XLOC_010962 | | XLOC_011609 | | XLOC_011645 | | XLOC_012981 | | XLOC_013541 | | XLOC_014351 | | XLOC_l2_000384 | | XLOC_l2_004317 | | XLOC_l2_007986 | | XLOC_l2_009139 | | XLOC_l2_009292 | | XLOC_l2_009441 | | XLOC_l2_009811 | | XLOC_l2_010056 | | XLOC_l2_012745 | | ZFP57 | | ZNF114 | | **log2 FC>2.8**   | ABCC2 | | --- | | ABHD11-AS1 | | ADRB2 | | AFF2 | | AHNAK2 | | ANK3 | | ANO1-AS2 | | AP1S3 | | ARHGEF37 | | ATP12A | | AVPR1A | | BCKDHB | | BCL11A | | BSPRY | | BZRAP1 | | C12orf28 | | C14orf34 | | C15orf41 | | C6orf15 | | C7orf41 | | C9orf167 | | CAMK1D | | CAMSAP3 | | CCDC165 | | CCNB3 | | CDHR4 | | CDK5R1 | | CLDN3 | | CLEC1B | | CLU | | CPS1 | | CSF3 | | CTSC | | CUBN | | CYP21A2 | | CYP27C1 | | DEFB103B | | DGKB | | DNAJA4 | | DNAJC27-AS1 | | DNER | | DSG1 | | DST | | DUOXA1 | | EMP1 | | ENPP5 | | EPB41 | | EPHA4 | | FBXO2 | | FBXO41 | | FIGN | | FLJ25917 | | FZD1 | | GABBR1 | | GABRB1 | | GABRP | | GAS6 | | GJC2 | | GSTO2 | | GUCY1A3 | | HIVEP1 | | HOXA2 | | HPN | | ID4 | | ITPR3 | | IZUMO2 | | KCNJ15 | | KCNMA1 | | KCTD4 | | KIAA1244 | | KLHDC7B | | KLK5 | | KLK6 | | KRT27 | | KRT6B | | LEP | | LGALS7 | | LGR6 | | LINC00239 | | LOC100131662 | | LOC100287314 | | LOC100505904 | | LOC283070 | | LOC340335 | | LOC645638 | | LOC648149 | | MBOAT1 | | MTL5 | | NCRNA00185 | | NDRG2 | | NOD2 | | NR3C2 | | NTRK3 | | OCIAD2 | | OR2T10 | | OR2T2 | | PDE4D | | PGBD3 | | PLCD1 | | POU3F3 | | PP12719 | | PPP1R13B | | PPP2R2B | | PRPH2 | | PTHLH | | RASGRF1 | | RGS9BP | | RNF222 | | RSPH1 | | S100A4 | | SAA2 | | SCRN1 | | SEMA4D | | SERPINB5 | | SERPINB7 | | SFN | | SGPP2 | | SLIT2 | | SORD | | SORT1 | | SOX9 | | SPACA4 | | SPRR2A | | TAS1R3 | | TMEM159 | | TMEM52 | | TMSB15B | | TOB1 | | TRIM29 | | TUBB2B | | UPK1B | | UPK3B | | WFDC2 | | WNT2B | | XLOC_001317 | | XLOC_007116 | | XLOC_010945 | | XLOC_012199 | | XLOC_012665 | | XLOC_014194 | | XLOC_l2_001947 | | XLOC_l2_006079 | | XLOC_l2_007543 | | XLOC_l2_010751 | | ZNF474 | |
| --- | --- | --- | --- | --- | --- | --- | --- | --- | --- | --- | --- | --- | --- | --- | --- | --- | --- | --- | --- | --- | --- | --- | --- | --- | --- | --- | --- | --- | --- | --- | --- | --- | --- | --- | --- | --- | --- | --- | --- | --- | --- | --- | --- | --- | --- | --- | --- | --- | --- | --- | --- | --- | --- | --- | --- | --- | --- | --- | --- | --- | --- | --- | --- | --- | --- | --- | --- | --- | --- | --- | --- | --- | --- | --- | --- | --- | --- | --- | --- | --- | --- | --- | --- | --- | --- | --- | --- | --- | --- | --- | --- | --- | --- | --- | --- | --- | --- | --- | --- | --- | --- | --- | --- | --- | --- | --- | --- | --- | --- | --- | --- | --- | --- | --- | --- | --- | --- | --- | --- | --- | --- | --- | --- | --- | --- | --- | --- | --- | --- | --- | --- | --- | --- | --- | --- | --- | --- | --- | --- | --- | --- | --- | --- | --- | --- | --- | --- | --- | --- | --- | --- | --- | --- | --- | --- | --- | --- | --- | --- | --- | --- | --- | --- | --- | --- | --- | --- | --- | --- | --- | --- | --- | --- | --- | --- | --- | --- | --- | --- | --- | --- | --- | --- | --- | --- | --- | --- | --- | --- | --- | --- | --- | --- | --- | --- | --- | --- | --- | --- | --- | --- | --- | --- | --- | --- | --- | --- | --- | --- | --- | --- | --- | --- | --- | --- | --- | --- | --- | --- | --- | --- | --- | --- | --- | --- | --- | --- | --- | --- | --- | --- | --- | --- | --- | --- | --- | --- | --- | --- | --- | --- | --- | --- | --- | --- | --- | --- | --- | --- | --- | --- | --- | --- | --- | --- | --- | --- | --- | --- | --- | --- | --- | --- | --- | --- | --- | --- | --- | --- | --- | --- | --- | --- | --- | --- | --- | --- | --- | --- | --- | --- | --- | --- | --- | --- | --- | --- | --- | --- | --- | --- | --- | --- | --- | --- | --- | --- | --- | --- | --- | --- | --- | --- | --- | --- | --- | --- | --- | --- | --- | --- | --- | --- | --- | --- | --- | --- | --- | --- | --- | --- | --- | --- | --- | --- | --- | --- | --- | --- | --- | --- | --- | --- | --- | --- | --- | --- | --- | --- | --- | --- | --- | --- | --- | --- | --- | --- | --- | --- | --- | --- | --- | --- | --- | --- | --- | --- | --- | --- | --- | --- | --- | --- | --- | --- | --- | --- | --- | --- | --- | --- | --- | --- | --- | --- | --- | --- | --- | --- | --- | --- | --- | --- | --- | --- | --- | --- | --- | --- | --- | --- | --- | --- | --- | --- | --- | --- | --- | --- | --- | --- | --- | --- | --- | --- | --- | --- | --- | --- | --- | --- | --- | --- | --- | --- | --- | --- | --- | --- | --- | --- | --- | --- | --- | --- | --- | --- | --- | --- | --- | --- | --- | --- | --- | --- | --- | --- | --- | --- | --- | --- | --- | --- | --- | --- | --- | --- | --- | --- | --- | --- | --- | --- | --- | --- | --- | --- | --- | --- | --- | --- | --- | --- | --- | --- | --- | --- | --- | --- | --- | --- | --- | --- | --- | --- | --- | --- | --- | --- | --- | --- | --- | --- | --- | --- | --- | --- | --- | --- | --- | --- | --- | --- | --- | --- | --- | --- | --- | --- | --- | --- | --- | --- | --- | --- | --- | --- | --- | --- | --- | --- | --- | --- | --- | --- | --- | --- | --- | --- | --- | --- | --- | --- | --- | --- | --- | --- | --- | --- | --- | --- | --- | --- | --- | --- | --- | --- | --- | --- | --- | --- | --- | --- | --- | --- | --- | --- | --- | --- | --- | --- | --- | --- | --- | --- | --- | --- | --- | --- | --- | --- | --- | --- | --- | --- | --- | --- | --- | --- | --- | --- | --- | --- | --- | --- | --- | --- | --- | --- | --- | --- | --- | --- | --- | --- | --- | --- | --- | --- | --- | --- | --- | --- | --- | --- | --- | --- | --- | --- | --- | --- | --- | --- | --- | --- | --- | --- | --- | --- | --- | --- | --- | --- | --- | --- | --- | --- | --- | --- | --- | --- | --- | --- | --- | --- | --- | --- | --- | --- | --- | --- | --- | --- | --- | --- | --- | --- | --- | --- | --- | --- | --- | --- | --- | --- | --- | --- |

**Supplementary file 1d:**

**List of jointly hypermethylated genes in ZAM Choriodecidua and over expressed in ZAM Amnion**

| AP1S3 |
| --- |
| BZRAP1 |
| CDK5R1 |
| DNAJA4 |
| EPB41 |
| FBXO41 |
| FIGN |
| FZD1 |
| GABRB1 |
| GABRP |
| GJC2 |
| LEP |
| NDRG2 |
| NR3C2 |
| POU3F3 |
| PPP1R13B |
| RNF222 |
| RSPH1 |
| SEMA4D |
| SERPINB7 |
| SORD |
| SOX9 |
| TOB1 |
| TRIM29 |
| WFDC2 |
| WNT2B |

**Supplementary file 1e:**

**List of disease mesh-term associated with hypermethylated genes in ZAM Choriodecidua and over expressed in ZAM Amnion**

| **MeSH-Term** | **MeSH-Term id(s)** | **p-value** |
| --- | --- | --- |
| Disease Attributes | C23.550.291 | 8,17E-05 |
| Virilism | C23.888.971 | 1,52E-04 |
| Genetic Predisposition to Disease | C23.550.291.687.500 | 3,24E-04 |
| Disease Susceptibility | C23.550.291.687 | 4,59E-04 |
| Disease Progression | C23.550.291.656 | 4,84E-04 |
| Osteoporotic Fractures | C26.404.545 | 8,30E-04 |
| Endocrine Gland Neoplasms | C19.344, C04.588.322 | 8,85E-04 |
| Gliosis | C23.550.369 | 1,26E-03 |
| Testicular Diseases | C12.294.829 | 1,49E-03 |
| alpha-Thalassemia | C16.320.070.875.100, C15.378.071.141.150.875.100 | 1,50E-03 |
| Pancreatic Neoplasms | C19.344.421, C06.301.761, C06.689.667, C04.588.274.761, C04.588.322.475 | 1,50E-03 |
| Brain Neoplasms | C10.228.140.211, C10.551.240.250, C04.588.614.250.195 | 1,50E-03 |
| Anuria | C13.351.968.934.070, C13.351.968.419.078, C12.777.419.078, C12.777.934.141 | 1,65E-03 |
| Foot Deformities | C05.330 | 1,76E-03 |
| Lymphatic Metastasis | C23.550.727.650.560, C04.697.650.560 | 1,78E-03 |
| Pancreatic Diseases | C06.689 | 1,91E-03 |
| Skin Neoplasms | C17.800.882, C04.588.805 | 1,93E-03 |
| Neoplasms, Germ Cell and Embryonal | C04.557.465 | 2,06E-03 |
| Hyperandrogenism | C16.131.939.316.129.750, C12.706.316.064.500, C13.351.875.253.064.500, C19.391.119.129.750, C13.351.875.253.129.750, C16.131.939.316.064.500, C19.391.119.064.500, C12.706.316.129.750 | 2,14E-03 |
| Dementia | C10.228.140.380 | 2,16E-03 |
| Kwashiorkor | C18.654.521.500.708.626.505 | 2,30E-03 |
| Neurofibroma | C04.557.580.600.580 | 2,37E-03 |
| Cryptorchidism | C12.294.829.258, C16.131.939.258, C19.391.829.258, C12.706.258 | 2,46E-03 |
| Genital Neoplasms, Male | C12.758.409, C04.588.945.440, C12.294.260 | 2,55E-03 |
| Nerve Sheath Neoplasms | C04.557.580.600 | 2,62E-03 |
| Central Nervous System Neoplasms | C04.588.614.250, C10.551.240 | 2,68E-03 |
| Cardio-Renal Syndrome | C13.351.968.419.780.400, C14.280.434.156, C12.777.419.780.400 | 2,75E-03 |
| Sarcoma | C04.557.450.795 | 3,32E-03 |
| Urogenital Abnormalities | C16.131.939 | 3,38E-03 |
| Nervous System Neoplasms | C10.551 | 3,39E-03 |
| Nervous System Neoplasms | C04.588.614 | 3,42E-03 |
| Autoimmune Diseases | C20.111 | 3,44E-03 |
| Urogenital Abnormalities | C12.706 | 3,45E-03 |
| Mandibular Fractures | C26.404.750.467.441, C26.260.275.500.400.255 | 3,46E-03 |
| Mandibular Diseases | C05.500.607 | 3,62E-03 |
| Uremia | C13.351.968.419.936, C12.777.419.936 | 3,92E-03 |
| Jaw Fractures | C26.404.750.467, C26.260.275.500.400 | 4,01E-03 |
| Brain Infarction | C14.907.253.855.200, C10.228.140.300.775.200, C10.228.140.300.150.477, C14.907.253.092.477 | 4,03E-03 |
| Female Athlete Triad Syndrome | C05.116.198.579.304, C19.391.240 | 4,11E-03 |
| Mandibular Diseases | C07.320.610 | 4,14E-03 |
| Neoplasm Metastasis | C23.550.727.650, C04.697.650 | 4,35E-03 |
| Prostatic Neoplasms | C12.758.409.750, C12.294.260.750, C04.588.945.440.770, C12.294.565.625 | 4,49E-03 |
| Brain Diseases | C10.228.140 | 4,55E-03 |
| Sertoli Cell-Only Syndrome | C12.294.365.700.754 | 4,60E-03 |
| Pathologic Processes | C23.550 | 4,63E-03 |
| Osteophyte | C05.116.540.310.800 | 4,72E-03 |
| Temporomandibular Joint Disorders | C05.500.607.221.897, C07.320.610.291.897, C05.550.905, C05.651.243.897, C07.678 | 4,75E-03 |
| Pleural Effusion | C08.528.652 | 4,76E-03 |
| Adrenocortical Adenoma | C19.344.078.265.500, C19.053.347.500.500, C19.053.098.265.500, C04.588.322.078.265.500 | 4,80E-03 |
| Pseudohypoaldosteronism | C16.320.565.861.770, C13.351.968.419.815.770, C12.777.419.815.770, C18.452.648.861.770 | 4,84E-03 |
| Premenstrual Syndrome | C23.550.568.968 | 4,84E-03 |
| 46, XX Disorders of Sex Development | C12.706.316.064, C19.391.119.064, C13.351.875.253.064, C16.131.939.316.064 | 4,85E-03 |
| Craniomandibular Disorders | C05.500.607.221, C07.320.610.291, C05.651.243 | 4,96E-03 |
| Osteoporosis | C05.116.198.579 | 5,04E-03 |
| Prostatic Diseases | C12.294.565 | 5,29E-03 |
| alpha-Thalassemia | C16.320.365.826.100, C15.378.420.826.100 | 5,29E-03 |
| Neurodegenerative Diseases | C10.574 | 5,32E-03 |
| Tracheomalacia | C17.300.182.895.500, C16.131.621.953.500, C08.907.796.500, C05.182.895.500 | 5,48E-03 |
| Tracheobronchomalacia | C08.907.796 | 5,48E-03 |
| Anhedonia | C23.888.592.604.039, C10.597.606.057 | 5,61E-03 |
| Heart Septal Defects, Ventricular | C16.131.240.400.560.540, C14.280.400.560.540, C14.240.400.560.540 | 5,87E-03 |
| Neurilemmoma | C04.557.580.625.650.595 | 6,08E-03 |
| Genital Diseases, Male | C12.294 | 6,11E-03 |
| Infertility, Male | C12.294.365.700 | 6,15E-03 |
| Pseudotumor Cerebri | C10.228.140.631.750 | 6,16E-03 |
| Endocrine System Diseases | C19 | 6,43E-03 |
| Brain Ischemia | C14.907.253.092, C10.228.140.300.150 | 6,44E-03 |
| Tooth Diseases | C07.793 | 6,50E-03 |
| Respiratory Tract Diseases | C08 | 6,65E-03 |
| Cholestasis | C06.130.120.135 | 6,80E-03 |
| Kidney Failure, Chronic | C13.351.968.419.780.750.500, C12.777.419.780.750.500 | 6,82E-03 |
| Tracheobronchomalacia | C16.131.621.953, C17.300.182.895, C05.182.895 | 6,84E-03 |
| Urinary Tract Infections | C01.539.895, C13.351.968.892, C12.777.892 | 6,85E-03 |
| Maxillofacial Injuries | C26.260.275.500 | 7,02E-03 |
| Autoimmune Diseases of the Nervous System | C20.111.258, C10.114 | 7,16E-03 |
| Encephalomyelitis, Autoimmune, Experimental | C20.111.258.625.300, C10.114.703.300, C10.314.350.250, C10.228.140.695.562.250 | 7,19E-03 |
| Immune System Diseases | C20 | 7,22E-03 |
| Ossification of Posterior Longitudinal Ligament | C05.116.900.480, C23.550.751.500 | 7,31E-03 |
| Cerebrovascular Disorders | C10.228.140.300, C14.907.253 | 7,69E-03 |
| Osteochondritis | C17.300.182.520, C05.182.520 | 7,77E-03 |
| Chondrosarcoma | C04.557.450.795.300, C04.557.450.565.280 | 7,78E-03 |
| Pelvic Inflammatory Disease | C01.539.635.500 | 8,08E-03 |
| Neurilemmoma | C04.557.580.600.610.595, C04.557.465.625.650.595 | 8,20E-03 |
| Refeeding Syndrome | C18.654.521.687 | 8,21E-03 |
| Acanthosis Nigricans | C17.800.621.430.530.100 | 8,24E-03 |
| Urogenital Neoplasms | C12.758 | 8,25E-03 |
| Carcinoma, Basal Cell | C04.557.470.565.165, C04.557.470.200.165 | 8,36E-03 |
| Nephritis, Interstitial | C12.777.419.570.643, C13.351.968.419.570.643 | 8,50E-03 |
| Nervous System Autoimmune Disease, Experimental | C10.114.703, C20.111.258.625 | 8,55E-03 |
| Teratocarcinoma | C04.557.465.900 | 8,59E-03 |
| Hyperphosphatemia | C18.452.750.199 | 8,72E-03 |
| Pelvic Infection | C01.539.635 | 8,72E-03 |
| Pleural Diseases | C08.528 | 8,98E-03 |
| Demyelinating Autoimmune Diseases, CNS | C10.228.140.695.562 | 9,11E-03 |
| Neuroendocrine Tumors | C04.557.580.625.650 | 9,17E-03 |
| Central Nervous System Diseases | C10.228 | 9,19E-03 |
| Hereditary Autoinflammatory Diseases | C17.800.827.368 | 9,39E-03 |
| Neuroendocrine Tumors | C04.557.465.625.650 | 9,42E-03 |
| Heart Failure, Systolic | C14.280.434.676 | 9,56E-03 |
| TDP-43 Proteinopathies | C10.574.950, C18.452.845.800 | 9,75E-03 |
| Demyelinating Autoimmune Diseases, CNS | C10.314.350 | 9,83E-03 |
| Carcinogenesis | C04.697.098, C23.550.727.098 | 9,88E-03 |
| Chromosome Inversion | C23.550.210.190 | 9,88E-03 |
| Esophageal and Gastric Varices | C06.552.494.414, C06.405.117.240 | 9,90E-03 |
| Protozoan Infections, Animal | C03.752.625, C03.701.688, C22.674.710 | 9,94E-03 |

**Supplementary file 1f:**

**List of jointly hypermethylated genes in ZAM Amnion and over expressed in ZAM Choriodecidua**

| | ADAMTS1  ADAMTS5 | | --- | | ANTXR1 | | APOA1 | | AR | | ATP13A4 | | BIN2 | | C1orf130 | | C1QTNF1 | | C2CD4B | | C7orf58 | | CDA | | CEACAM3 | | COL14A1 | | CORO2A | | CXCR6 | | CYP11A1 | | DENND2A | | DIO2 | | DSCR8 | | EEPD1 | | ENTPD8 | | FAM153B | | FHOD3 | | FIGNL2 | | FLJ43663 | | GCM1 | | GDF15 | | GH1 | | GKN1 | | GPC4 | | GTSF1 | | GYLTL1B | | HMGB3 | | HN1 | | | HPCAL1 | | --- | | HPGD | | HSD3B1 | | ICAM2 | | IL15 | | IL1RL1 | | IL20RB | | ISM2 | | ITGA1 | | JAM2 | | JAZF1 | | KCNJ16 | | KIAA1324 | | KITLG | | KLK3 | | LAIR2 | | LGALS14 | | LIFR | | LINGO2 | | LIPG | | MAGEA8 | | MAPT | | MCAM | | MFSD2A | | MMP11 | | MMP7 | | NFASC | | NFE2L3 | | NKD2 | | NKG7 | | NLGN4X | | NLRP7 | | OGDHL | | OLR1 | | | OOEP | | --- | | PAGE4 | | PAPPA2 | | PAPSS2 | | PARD6G | | PDCD1LG2 | | PLEKHH2 | | PPAP2A | | PPAPDC3 | | PPARG | | PPP4R4 | | PRB3 | | PRG2 | | PROK1 | | PTGER3 | | SCARB1 | | SERPINB11 | | SLC44A5 | | SLC6A2 | | SOAT1 | | SOHLH2 | | SSH2 | | STAB2 | | SV2B | | TLR4 | | TM4SF5 | | TMEM132B | | TNFSF10 | | TPST1 | | TRIM14 | | TSKU | | TSNARE1 | | TSPAN8 | | VAV3 | | XAGE3 | | ZFP57 | |
| --- | --- | --- | --- | --- | --- | --- | --- | --- | --- | --- | --- | --- | --- | --- | --- | --- | --- | --- | --- | --- | --- | --- | --- | --- | --- | --- | --- | --- | --- | --- | --- | --- | --- | --- | --- | --- | --- | --- | --- | --- | --- | --- | --- | --- | --- | --- | --- | --- | --- | --- | --- | --- | --- | --- | --- | --- | --- | --- | --- | --- | --- | --- | --- | --- | --- | --- | --- | --- | --- | --- | --- | --- | --- | --- | --- | --- | --- | --- | --- | --- | --- | --- | --- | --- | --- | --- | --- | --- | --- | --- | --- | --- | --- | --- | --- | --- | --- | --- | --- | --- | --- | --- | --- | --- | --- | --- |

**Supplementary file 1g:**

**List of disease mesh-term associated with hypermethylated genes in ZAM Amnion and over expressed in ZAM Choriodecidua**

| | **MeSH-Term** | **MeSH-Term id(s)** | **p-value** | | --- | --- | --- | | Gestational Trophoblastic Disease | C04.557.465.955.416, C04.850.908.416, C13.703.720.949.416 | 1,92E-08 | | Trophoblastic Neoplasms | C04.850.908, C13.703.720.949 | 2,33E-08 | | Trophoblastic Neoplasms | C04.557.465.955 | 2,35E-08 | | Rheumatoid Nodule | C17.300.775.099.683, C05.799.114.683, C05.550.114.154.683 | 4,13E-08 | | Pregnancy Complications, Neoplastic | C04.850, C13.703.720 | 5,56E-08 | | Hydatidiform Mole | C13.703.720.949.416.875, C04.557.465.955.416.812, C04.850.908.416.750 | 1,73E-07 | | Choriocarcinoma | C04.557.465.955.416.202, C13.703.720.949.416.218, C04.850.908.416.186 | 1,17E-06 | | Choriocarcinoma | C04.557.470.200.025.455, C04.557.465.955.207 | 1,19E-06 | | Communicable Diseases | C01.539.221 | 1,92E-06 | | Pre-Eclampsia | C13.703.395.249 | 6,78E-06 | | Pregnancy, Ectopic | C13.703.733 | 9,04E-06 | | Hypertension, Pregnancy-Induced | C13.703.395 | 9,34E-06 | | Metaplasia | C23.550.589 | 9,39E-06 | | Melanoma, Experimental | C04.557.465.625.650.510.525, C04.619.600, C04.557.580.625.650.510.525, C04.557.665.510.525 | 9,57E-06 | | Hypersensitivity, Delayed | C20.543.418 | 1,09E-05 | | Uveitis | C11.941.879 | 1,68E-05 | | Neovascularization, Pathologic | C23.550.589.500 | 2,39E-05 | | Rheumatic Diseases | C05.799 | 2,61E-05 | | Placenta Diseases | C13.703.590 | 3,04E-05 | | Tendon Injuries | C26.874 | 4,43E-05 | | Osteoarthritis, Knee | C05.799.613.500, C05.550.114.606.500 | 6,64E-05 | | Hepatitis, Autoimmune | C06.552.380.350.050, C20.111.567 | 6,98E-05 | | Dermatitis, Contact | C17.800.815.255, C17.800.174.255 | 7,84E-05 | | Infertility | C13.351.500.365 | 9,15E-05 | | Fetal Growth Retardation | C23.550.393.450, C13.703.277.370, C16.300.390 | 9,71E-05 | | Uveitis, Anterior | C11.941.879.780.880 | 1,26E-04 | | Sarcoidosis, Pulmonary | C15.604.515.827.725, C08.381.483.725 | 1,28E-04 | | Infertility, Female | C13.351.500.365.700 | 1,34E-04 | | Leukemia-Lymphoma, Adult T-Cell | C15.604.515.560.575.100, C04.557.337.428.580.100, C20.683.515.528.582.100 | 1,34E-04 | | Pregnancy Complications | C13.703 | 1,46E-04 | | Rhinitis | C08.730.674 | 1,56E-04 | | Joint Diseases | C05.550 | 1,60E-04 | | Tuberculosis, Pleural | C08.730.912, C08.528.928, C01.252.410.040.552.846.877 | 1,66E-04 | | Lichen Planus | C17.800.859.475.560 | 1,68E-04 | | Panuveitis | C11.941.879.780 | 1,86E-04 | | Sarcoidosis | C15.604.515.827 | 1,89E-04 | | Neoplasms, Germ Cell and Embryonal | C04.557.465 | 2,01E-04 | | Brain Neoplasms | C04.588.614.250.195, C10.228.140.211, C10.551.240.250 | 2,05E-04 | | Dermatitis, Allergic Contact | C17.800.815.255.100, C17.800.174.255.100, C20.543.418.150 | 2,21E-04 | | Myocarditis | C14.280.238.625 | 2,49E-04 | | Leukemia, T-Cell | C04.557.337.428.580, C20.683.515.528.582, C15.604.515.560.575 | 2,52E-04 | | Alveolar Bone Loss | C07.465.714.354.500, C05.116.264.150 | 2,56E-04 | | Otitis Media with Effusion | C09.218.705.663.683 | 2,74E-04 | | Encephalitis, Viral | C10.228.228.210.150.300, C10.228.228.245.340, C02.182.500.300, C02.290 | 2,92E-04 | | Granuloma | C15.604.515.292 | 2,94E-04 | | Arteritis | C14.907.184, C14.907.940.090 | 2,98E-04 | | Temporomandibular Joint Disorders | C05.550.905, C05.500.607.221.897, C07.678, C07.320.610.291.897, C05.651.243.897 | 3,01E-04 | | Craniomandibular Disorders | C05.500.607.221, C07.320.610.291, C05.651.243 | 3,19E-04 | | Skin Diseases, Vascular | C17.800.862 | 3,30E-04 | | Lichenoid Eruptions | C17.800.859.475 | 3,36E-04 | | Colitis | C06.405.205.265, C06.405.469.158.188 | 3,45E-04 | | Carcinoma, Merkel Cell | C04.925.216, C02.928.216, C04.557.465.625.650.240.325, C02.256.721.150, C04.557.580.625.650.240.325, C04.557.470.200.025.370.325 | 3,49E-04 | | Pleurisy | C08.730.582, C08.528.735 | 3,49E-04 | | Hemostatic Disorders | C14.907.454 | 3,54E-04 | | Giant Cell Arteritis | C14.907.940.090.530, C10.228.140.300.850.500, C14.907.184.438, C14.907.940.907.700, C10.114.875.700, C17.800.862.252, C14.907.253.946.700, C20.111.258.962.800 | 3,59E-04 | | Arthritis, Rheumatoid | C20.111.199 | 3,60E-04 | | Arthritis, Rheumatoid | C17.300.775.099, C05.799.114, C05.550.114.154 | 3,61E-04 | | Liposarcoma | C04.557.450.795.465, C04.557.450.550.420 | 3,66E-04 | | Arthritis | C05.550.114 | 3,75E-04 | | Shock, Hemorrhagic | C23.550.835.650, C23.550.414.980 | 3,80E-04 | | Demyelinating Autoimmune Diseases, CNS | C10.314.350 | 3,87E-04 | | Central Nervous System Neoplasms | C04.588.614.250, C10.551.240 | 4,01E-04 | | Hemostatic Disorders | C15.378.463.515 | 4,17E-04 | | Female Urogenital Diseases | C13.351 | 4,35E-04 | | Neoplasms, Glandular and Epithelial | C04.557.470 | 4,40E-04 | | Respiration Disorders | C08.618 | 4,49E-04 | | Encephalitozoonosis | C01.703.617.300 | 4,90E-04 | | Pituitary Neoplasms | C04.588.614.250.195.885.500.600, C10.551.240.250.700.500.500, C10.228.140.211.885.500.600, C10.228.140.617.477.600 | 4,97E-04 | | Scleroderma, Systemic | C17.800.784, C17.300.799 | 4,97E-04 | | Multiple Sclerosis, Relapsing-Remitting | C20.111.258.250.500.600, C10.114.375.500.600, C10.314.350.500.600 | 4,99E-04 | | Arbovirus Infections | C02.081 | 5,02E-04 | | Hemorrhagic Disorders | C15.378.463 | 5,15E-04 | | Nervous System Neoplasms | C10.551 | 5,26E-04 | | Multiple Sclerosis | C20.111.258.250.500, C10.114.375.500, C10.314.350.500 | 5,26E-04 | | Nervous System Neoplasms | C04.588.614 | 5,32E-04 | | Rheumatic Diseases | C17.300.775 | 5,33E-04 | | Hypothalamic Neoplasms | C10.228.140.211.885.500, C04.588.614.250.195.885.500, C10.228.140.617.477, C10.551.240.250.700.500 | 5,35E-04 | | Plaque, Atherosclerotic | C23.300.823 | 5,43E-04 | | Conjunctivitis | C11.187.183 | 5,54E-04 | | Cardiomyopathy, Dilated | C14.280.238.070, C14.280.195.160 | 5,55E-04 | | Periodontal Atrophy | C07.465.714.354 | 5,78E-04 | | Lichen Planus, Oral | C07.465.397, C17.800.859.475.560.397 | 5,90E-04 | | Bone Resorption | C05.116.264 | 5,91E-04 | | Demyelinating Autoimmune Diseases, CNS | C10.114.375, C20.111.258.250 | 6,38E-04 | | Rotavirus Infections | C02.782.791.814 | 6,51E-04 | | Pituitary Neoplasms | C19.344.609, C19.700.734, C10.228.140.617.738.675, C04.588.322.609 | 6,70E-04 | | Supratentorial Neoplasms | C04.588.614.250.195.885, C10.228.140.211.885, C10.551.240.250.700 | 6,73E-04 | | Acute Coronary Syndrome | C14.280.647.124, C23.888.646.215.500.074, C14.907.585.187.074, C14.907.585.124, C14.280.647.187.074 | 6,77E-04 | | Thymus Neoplasms | C15.604.861, C04.588.894.949 | 6,78E-04 | | Collagen Diseases | C17.300.200 | 7,04E-04 | | Hypertension | C14.907.489 | 7,12E-04 | | Polymyositis | C05.651.594.819, C10.668.491.562.575 | 7,17E-04 | | Crohn Disease | C06.405.469.432.500, C06.405.205.731.500 | 7,24E-04 | | Dysentery | C06.405.205.331, C06.405.469.300 | 7,34E-04 | | Adenoma | C04.557.470.035 | 7,43E-04 | | Bacteroidaceae Infections | C01.252.400.110 | 7,43E-04 | | Aspergillosis, Allergic Bronchopulmonary | C17.800.838.208.416.249.074, C01.703.295.328.249.074, C08.674.060, C20.543.480.680.085, C08.730.435.090, C01.703.534.090, C01.539.800.200.383.249.074, C08.381.472.850.500, C01.703.513.249.074 | 7,50E-04 | | Onchocerciasis, Ocular | C03.300.562, C03.335.508.700.750.361.699.500, C11.294.725.562 | 7,55E-04 | | Eosinophilia | C15.378.553.231 | 7,66E-04 | | Hypertrophy, Left Ventricular | C14.280.195.400, C23.300.775.250.400 | 7,85E-04 | | Genital Neoplasms, Female | C13.351.937.418 | 7,96E-04 | | Mucopolysaccharidosis VI | C18.452.648.595.600.670, C16.320.565.595.600.670, C16.320.565.202.715.670, C18.452.648.202.715.670, C17.300.550.575.670 | 8,05E-04 | | Esophageal Neoplasms | C06.405.249.205, C04.588.443.353, C06.301.371.205, C06.405.117.430, C04.588.274.476.205 | 9,12E-04 | | Genital Diseases, Female | C13.351.500 | 9,88E-04 | | Hepatitis, Chronic | C06.552.380.350 | 1,00E-03 | | Prolactinoma | C10.228.140.617.738.675.800, C04.557.470.035.625, C19.700.734.792, C19.344.609.792, C04.588.322.609.792 | 1,01E-03 | | Rupture | C26.761 | 1,02E-03 | | Encephalitis | C02.182.500, C10.228.228.210.150 | 1,02E-03 | | Thyroid Diseases | C19.874 | 1,02E-03 | | Sinusitis | C09.603.692.752, C08.730.749, C08.460.692.752 | 1,03E-03 | | Uterine Neoplasms | C13.351.500.852.762 | 1,05E-03 | | Shock, Traumatic | C26.797 | 1,07E-03 | | Mastocytoma | C04.557.450.565.465.249, C17.800.508.236 | 1,07E-03 | | Uveal Diseases | C11.941 | 1,08E-03 | | Vasculitis, Central Nervous System | C20.111.258.962 | 1,09E-03 | | Encephalomyelitis, Autoimmune, Experimental | C20.111.258.625.300, C10.314.350.250, C10.228.140.695.562.250, C10.114.703.300 | 1,10E-03 | | Slow Virus Diseases | C02.839 | 1,10E-03 | | Vasculitis, Central Nervous System | C14.907.253.946, C10.228.140.300.850, C10.114.875, C14.907.940.907 | 1,14E-03 | | Spondylarthritis | C05.116.900.853.625, C05.550.114.865 | 1,15E-03 | | Uterine Neoplasms | C04.588.945.418.948 | 1,16E-03 | | Uterine Neoplasms | C13.351.937.418.875 | 1,18E-03 | | Venous Thrombosis | C14.907.355.830.925 | 1,18E-03 | | Connective Tissue Diseases | C17.300 | 1,19E-03 | | Corneal Neovascularization | C11.204.290 | 1,21E-03 | | Glomerulonephritis, IGA | C20.111.525, C12.777.419.570.363.608, C13.351.968.419.570.363.608 | 1,22E-03 | | Cysticercosis | C03.335.190.902.185 | 1,28E-03 | | Anoxia | C23.888.852.079 | 1,29E-03 | | Digestive System Abnormalities | C06.198 | 1,30E-03 | | Autoimmune Diseases of the Nervous System | C20.111.258, C10.114 | 1,30E-03 | | Nematode Infections | C03.335.508 | 1,31E-03 | | Acquired Immunodeficiency Syndrome | C20.673.480.040, C02.839.040, C02.782.815.616.400.040, C02.800.801.400.040 | 1,33E-03 | | Spondylitis | C05.116.900.853 | 1,33E-03 | | Ascites | C23.550.081 | 1,34E-03 | | Eye Infections | C11.294 | 1,35E-03 | | Nervous System Autoimmune Disease, Experimental | C10.114.703, C20.111.258.625 | 1,37E-03 | | Bone Marrow Neoplasms | C15.378.400.200, C04.588.448.200, C15.378.190.250 | 1,38E-03 | | Encephalitis | C10.228.228.245 | 1,39E-03 | | Osteoarthritis, Hip | C05.799.613.400, C05.550.114.606.400 | 1,39E-03 | | Paracoccidioidomycosis | C01.703.700, C17.800.838.208.600, C01.703.295.600, C01.539.800.200.600 | 1,40E-03 | | Demyelinating Diseases | C10.314 | 1,43E-03 | | Growth Disorders | C23.550.393 | 1,43E-03 | | Spinal Diseases | C05.116.900 | 1,43E-03 | | Keratitis | C11.204.564 | 1,45E-03 | | Demyelinating Autoimmune Diseases, CNS | C10.228.140.695.562 | 1,48E-03 | | Suppuration | C01.539.830 | 1,48E-03 | | Uterine Diseases | C13.351.500.852 | 1,49E-03 | | Genital Neoplasms, Female | C04.588.945.418 | 1,50E-03 | | Cicatrix | C23.550.355.274 | 1,54E-03 | | Female Urogenital Diseases and Pregnancy Complications | C13 | 1,54E-03 | | Melanoma | C04.557.465.625.650.510, C04.557.580.625.650.510, C04.557.665.510 | 1,54E-03 | | Bronchitis | C08.127.446, C08.381.495.146 | 1,54E-03 | | Nevi and Melanomas | C04.557.665 | 1,72E-03 | | Ehrlichiosis | C01.252.400.825.200 | 1,73E-03 | | Neuroendocrine Tumors | C04.557.580.625.650 | 1,74E-03 | | Nasal Polyps | C09.603.557, C08.460.572, C23.300.825.557 | 1,75E-03 | | Gastroenteritis | C06.405.205 | 1,77E-03 | | Sarcopenia | C10.597.613.612.500, C23.888.592.608.612.500, C23.300.070.500.500 | 1,78E-03 | | Neuroendocrine Tumors | C04.557.465.625.650 | 1,79E-03 | | Abdominal Neoplasms | C04.588.033 | 1,81E-03 | | Wallerian Degeneration | C23.550.737.750 | 1,85E-03 | | Flavivirus Infections | C02.782.350.250 | 1,87E-03 | | Endometrial Neoplasms | C13.351.500.852.762.200 | 1,88E-03 | | Dermatitis | C17.800.174 | 1,91E-03 | | Rhinitis | C08.460.799, C09.603.799 | 1,92E-03 | | Neoplasms, Adipose Tissue | C04.557.450.550 | 1,93E-03 | | Ehrlichiosis | C01.252.400.054.160 | 1,98E-03 | | Liver Cirrhosis, Biliary | C06.552.630.400, C06.552.150.250, C06.130.120.135.250.250 | 1,99E-03 | | Shock | C23.550.835 | 2,00E-03 | | Neoplasms, Connective and Soft Tissue | C04.557.450 | 2,02E-03 | | Microsporidiosis | C01.703.617 | 2,04E-03 | | Barrett Esophagus | C06.405.117.102, C06.198.102 | 2,10E-03 | | Musculoskeletal Diseases | C05 | 2,11E-03 | | Hypereosinophilic Syndrome | C15.378.553.231.549 | 2,12E-03 | | Sarcoma | C04.557.450.795 | 2,15E-03 | | Corneal Diseases | C11.204 | 2,15E-03 | | Cardiomegaly | C14.280.195 | 2,16E-03 | | Tendinopathy | C26.874.800 | 2,16E-03 | | Biliary Tract Diseases | C06.130 | 2,19E-03 | | Brain Abscess | C01.323, C01.539.830.025.160, C10.228.140.116, C10.228.228.090 | 2,19E-03 | | Eye Infections | C01.539.375 | 2,22E-03 | | AIDS-Related Opportunistic Infections | C20.673.480.100, C01.539.597.050, C03.684.050, C02.597.050, C02.782.815.616.400.100 | 2,22E-03 | | Reoviridae Infections | C02.782.791 | 2,25E-03 | | Periodontal Diseases | C07.465.714 | 2,27E-03 | | Urogenital Neoplasms | C13.351.937 | 2,29E-03 | | Pulmonary Aspergillosis | C08.381.472.850 | 2,29E-03 | | Herpes Genitalis | C13.351.500.342, C02.800.801.350, C12.294.329, C02.256.466.382.290 | 2,32E-03 | | Prosthesis Failure | C23.550.767.865 | 2,33E-03 | | Cardiomegaly | C23.300.775.250 | 2,36E-03 | | Epiretinal Membrane | C11.768.328 | 2,39E-03 | | Osteoarthritis | C05.799.613, C05.550.114.606 | 2,43E-03 | | Adenocarcinoma | C04.557.470.200.025 | 2,45E-03 | | Bronchial Hyperreactivity | C08.127.210 | 2,48E-03 | | Endometrial Neoplasms | C04.588.945.418.948.585 | 2,50E-03 | | Pituitary Diseases | C10.228.140.617.738 | 2,51E-03 | | Leishmaniasis, Diffuse Cutaneous | C03.858.560.400.350, C17.800.838.775.560.400.350, C03.752.300.500.400.350 | 2,54E-03 | | Taeniasis | C03.335.190.902 | 2,56E-03 | | Xanthomatosis | C18.452.584.750 | 2,56E-03 | | Abdominal Pain | C23.888.646.100, C23.888.821.030 | 2,57E-03 | | Rhabdoviridae Infections | C02.782.580.830 | 2,59E-03 | | Endometrial Neoplasms | C13.351.937.418.875.200 | 2,60E-03 | | Neoplasm Metastasis | C23.550.727.650, C04.697.650 | 2,61E-03 | | Dry Eye Syndromes | C11.496.260 | 2,61E-03 | | Disease Resistance | C23.550.291.671 | 2,61E-03 | | Kashin-Beck Disease | C05.116.099.708.534 | 2,63E-03 | | Tendinopathy | C05.651.869 | 2,66E-03 | | Placenta Accreta | C13.703.420.643, C13.703.590.609 | 2,72E-03 | | Skin Diseases, Eczematous | C17.800.815 | 2,73E-03 | | Aggressive Periodontitis | C07.465.714.533.161 | 2,77E-03 | | Pyometra | C13.351.500.852.544 | 2,81E-03 | | Anaplasmataceae Infections | C01.252.400.054 | 2,84E-03 | | Periapical Periodontitis | C07.465.714.306.700, C07.465.714.533.487, C07.320.830.700 | 2,88E-03 | | Vasculitis | C14.907.940 | 2,90E-03 | | Mononegavirales Infections | C02.782.580 | 2,94E-03 | | Multiple Myeloma | C15.378.463.515.460, C14.907.454.460, C20.683.780.650, C15.378.147.780.650 | 2,97E-03 | | Trophoblastic Tumor, Placental Site | C04.850.908.416.186.875, C04.557.465.955.207.875, C04.557.465.955.416.202.875, C13.703.720.949.416.218.875, C04.557.470.200.025.455.875 | 3,00E-03 | | Graves Ophthalmopathy | C11.270.842, C20.111.555.500, C19.874.397.370.500, C19.874.283.605.500, C11.675.349.500.500 | 3,03E-03 | | Obstetric Labor Complications | C13.703.420 | 3,06E-03 | | Shwartzman Phenomenon | C15.378.463.515.810, C14.907.454.810, C14.907.940.890 | 3,09E-03 | | Mandibular Diseases | C05.500.607 | 3,11E-03 | | Multiple Myeloma | C04.557.595.500, C20.683.515.845 | 3,12E-03 | | HELLP Syndrome | C13.703.395.186 | 3,14E-03 | | Dermatomyositis | C17.800.185, C10.668.491.562.575.500, C17.300.250, C05.651.594.819.500, C05.651.594.297, C10.668.491.562.150 | 3,18E-03 | | Parapsoriasis | C17.800.859.575 | 3,19E-03 | | Neoplasms, Connective Tissue | C04.557.450.565 | 3,23E-03 | | Orthomyxoviridae Infections | C02.782.620 | 3,23E-03 | | Salivary Gland Diseases | C07.465.815 | 3,26E-03 | | Secernentea Infections | C03.335.508.700 | 3,27E-03 | | Fetal Diseases | C16.300 | 3,30E-03 | | Paranasal Sinus Diseases | C08.460.692, C09.603.692 | 3,31E-03 | | Bile Duct Diseases | C06.130.120 | 3,31E-03 | | Neoplasms, Vascular Tissue | C04.557.645 | 3,32E-03 | | Esophageal Diseases | C06.405.117 | 3,32E-03 | | Alveolitis, Extrinsic Allergic | C08.381.483.125, C20.543.480.680.075, C08.674.055 | 3,34E-03 | | Graves Disease | C19.874.283.605, C19.874.397.370, C11.675.349.500, C20.111.555 | 3,41E-03 | | Neoplasms by Site | C04.588 | 3,48E-03 | | Meningitis, Bacterial | C10.228.228.507.280, C01.252.200.500, C10.228.228.180.500 | 3,50E-03 | | Fetal Diseases | C13.703.277 | 3,53E-03 | | Thrombosis | C14.907.355.830 | 3,54E-03 | | Central Nervous System Viral Diseases | C02.182, C10.228.228.210 | 3,55E-03 | | Lacrimal Apparatus Diseases | C11.496 | 3,55E-03 | | Mandibular Diseases | C07.320.610 | 3,56E-03 | | Head and Neck Neoplasms | C04.588.443 | 3,57E-03 | | Fibrosis | C23.550.355 | 3,58E-03 | | Angiolymphoid Hyperplasia with Eosinophilia | C17.800.060, C15.604.515.292.007, C15.378.553.231.085 | 3,59E-03 | | Respiratory Syncytial Virus Infections | C02.782.580.600.620.750 | 3,61E-03 | | Pituitary Diseases | C19.700 | 3,65E-03 | | Pulmonary Emphysema | C08.381.495.389.750 | 3,66E-03 | | Spinal Cord Compression | C26.819.678, C10.228.854.761 | 3,72E-03 | | Abscess | C01.539.830.025 | 3,74E-03 | | Otitis Media | C09.218.705.663 | 3,74E-03 | | Helminthiasis | C03.335 | 3,74E-03 | | Osteolysis | C05.116.264.579 | 3,79E-03 | | Testicular Hydrocele | C12.294.882 | 3,80E-03 | | Pneumovirus Infections | C02.782.580.600.620 | 3,82E-03 | | Granuloma | C23.550.382 | 3,84E-03 | | Pain | C23.888.646 | 3,84E-03 | | Arthritis, Psoriatic | C17.800.859.675.175, C05.550.114.865.800.424, C05.116.900.853.625.800.424, C05.550.114.145 | 3,85E-03 | | Abortion, Habitual | C13.703.039.089 | 3,85E-03 | | Pneumonia, Pneumocystis | C08.730.610.675, C08.730.435.700, C01.703.770.700, C01.703.534.700, C08.381.472.700, C08.381.677.675 | 3,86E-03 | | Blood Loss, Surgical | C23.550.505.300, C23.550.414.300 | 3,90E-03 | | Polyradiculoneuropathy | C20.111.258.750, C10.314.750, C10.114.750 | 3,93E-03 | | Balantidiasis | C06.405.469.452.146, C03.752.200.146, C03.432.146 | 3,95E-03 | | Signs and Symptoms, Respiratory | C23.888.852 | 3,98E-03 | | Influenza, Human | C02.782.620.365, C08.730.310 | 3,98E-03 | | Pancreatitis, Chronic | C06.689.750.830 | 3,99E-03 | | Strongylida Infections | C03.335.508.700.775 | 3,99E-03 | | X-Linked Combined Immunodeficiency Diseases | C20.673.815.500, C16.614.815.500, C16.320.322.968 | 4,02E-03 | | Signs and Symptoms | C23.888 | 4,03E-03 | | Hypertension, Pregnancy-Induced | C14.907.489.480 | 4,04E-03 | | Dog Diseases | C22.268 | 4,09E-03 | | Hypothalamic Diseases | C10.228.140.617 | 4,11E-03 | | Peritoneal Neoplasms | C04.588.274.780, C06.844.620, C06.301.780, C04.588.033.513 | 4,12E-03 | | Arthritis, Experimental | C05.550.114.015 | 4,12E-03 | | Asymptomatic Infections | C23.550.291.187.500 | 4,13E-03 | | Muscular Dystrophy, Animal | C22.595 | 4,13E-03 | | Keratitis, Herpetic | C11.294.800.475, C02.256.466.382.465, C11.204.564.425, C02.325.465 | 4,22E-03 | | Respiratory Insufficiency | C08.618.846 | 4,25E-03 | | Chagas Cardiomyopathy | C14.280.238.190, C03.752.300.900.200.190 | 4,27E-03 | | Gingival Overgrowth | C07.465.714.258.428 | 4,27E-03 | | Pneumonia | C08.381.677, C08.730.610 | 4,29E-03 | | Polyradiculoneuropathy | C10.668.829.800.750 | 4,31E-03 | | Bone Neoplasms | C04.588.149, C05.116.231 | 4,33E-03 | | Tuberculosis, Pulmonary | C08.381.922, C08.730.939, C01.252.410.040.552.846.899 | 4,34E-03 | | Synovitis | C05.550.870 | 4,40E-03 | | Paramyxoviridae Infections | C02.782.580.600 | 4,45E-03 | | Lupus Erythematosus, Cutaneous | C17.300.475, C17.800.480 | 4,46E-03 | | Pneumocystis Infections | C01.703.770 | 4,46E-03 | | Necrobiotic Disorders | C17.800.550, C17.300.200.495 | 4,47E-03 | | Paraproteinemias | C15.378.147.780 | 4,48E-03 | | Exophthalmos | C11.675.349 | 4,49E-03 | | Arteriosclerosis | C14.907.137.126 | 4,52E-03 | | Paraproteinemias | C20.683.780 | 4,55E-03 | | Stomatitis | C07.465.864 | 4,61E-03 | | Down Syndrome | C16.131.260.260, C10.597.606.643.220, C16.131.077.327, C16.320.180.260 | 4,62E-03 | | Lymphatic Metastasis | C23.550.727.650.560, C04.697.650.560 | 4,62E-03 | | Gastritis | C06.405.748.398, C06.405.205.697 | 4,65E-03 | | Neoplasms, Plasma Cell | C04.557.595 | 4,66E-03 | | Ovarian Diseases | C19.391.630 | 4,67E-03 | | Otitis | C09.218.705 | 4,67E-03 | | Ovarian Diseases | C13.351.500.056.630 | 4,70E-03 | | Bronchitis | C08.730.099 | 4,80E-03 | | Dysentery, Bacillary | C06.405.205.331.479, C06.405.469.300.479, C01.252.400.310.229 | 4,81E-03 | | Glomerulonephritis | C13.351.968.419.570.363, C12.777.419.570.363 | 4,82E-03 | | Skin Diseases, Vesiculobullous | C17.800.865 | 4,86E-03 | | Behcet Syndrome | C17.800.862.150, C07.465.075, C14.907.940.100, C11.941.879.780.880.200 | 4,86E-03 | | Necrosis | C23.550.717 | 4,88E-03 | | Systemic Vasculitis | C14.907.940.897 | 4,90E-03 | | Scrub Typhus | C01.252.400.780.850 | 4,94E-03 | | Pleural Effusion, Malignant | C08.528.694.700, C04.588.894.797.640.700, C08.785.640.700, C08.528.652.700 | 4,96E-03 | | Ulcer | C23.550.891 | 4,96E-03 | | Skin Neoplasms | C17.800.882, C04.588.805 | 4,97E-03 | | Conjunctival Diseases | C11.187 | 5,01E-03 | | Epidermolysis Bullosa | C17.800.865.410, C16.131.831.493, C17.800.804.493, C17.800.827.275 | 5,02E-03 | | Signs and Symptoms, Digestive | C23.888.821 | 5,02E-03 | | Adnexal Diseases | C13.351.500.056 | 5,14E-03 | | Meningitis | C10.228.228.507 | 5,15E-03 | | Polyomavirus Infections | C02.256.721 | 5,16E-03 | | Cough | C08.618.248, C23.888.852.293 | 5,17E-03 | | Embolism and Thrombosis | C14.907.355 | 5,25E-03 | | Rhinitis, Allergic, Perennial | C08.674.453.500, C20.543.480.680.443.500, C08.460.799.315.500, C09.603.799.315.500 | 5,26E-03 | | Myositis | C10.668.491.562 | 5,30E-03 | | Angina Pectoris | C23.888.646.215.500 | 5,38E-03 | | Eye Infections, Bacterial | C01.539.375.354, C01.252.354, C11.294.354 | 5,39E-03 | | Hip Dislocation, Congenital | C16.131.621.449, C05.660.449 | 5,43E-03 | | Arthralgia | C05.550.091, C23.888.646.130 | 5,44E-03 | | Cholestasis | C06.130.120.135 | 5,49E-03 | | Cholestasis, Intrahepatic | C06.130.120.135.250, C06.552.150 | 5,51E-03 | | Hematologic Neoplasms | C04.588.448, C15.378.400 | 5,68E-03 | | Spondylarthropathies | C05.116.900.853.625.800, C05.550.114.865.800 | 5,72E-03 | | Angina Pectoris | C14.280.647.187, C14.907.585.187 | 5,80E-03 | | Dermatitis, Seborrheic | C17.800.794.230, C17.800.174.580, C17.800.859.350, C17.800.815.580 | 5,81E-03 | | Cicatrix, Hypertrophic | C23.550.355.274.505 | 5,95E-03 | | Herpes Simplex | C02.256.466.382 | 6,02E-03 | | Neoplasms, Neuroepithelial | C04.557.470.670, C04.557.580.625.600, C04.557.465.625.600 | 6,08E-03 | | Occupational Diseases | C24 | 6,10E-03 | | Asthma | C08.381.495.108 | 6,10E-03 | | Central Nervous System Bacterial Infections | C01.252.200 | 6,16E-03 | | Myositis | C05.651.594 | 6,19E-03 | | Cranial Nerve Injuries | C26.260.237, C10.292.262, C26.915.300.400, C10.900.300.218 | 6,20E-03 | | Tooth Injuries | C26.900, C07.793.850 | 6,21E-03 | | Asthma | C20.543.480.680.095 | 6,27E-03 | | Atherosclerosis | C14.907.137.126.307 | 6,29E-03 | | Central Nervous System Infections | C10.228.228 | 6,36E-03 | | Sjogren's Syndrome | C07.465.815.929.669, C05.799.114.774, C05.550.114.154.774, C20.111.199.774, C11.496.260.719, C17.300.775.099.774 | 6,39E-03 | | Central Nervous System Bacterial Infections | C10.228.228.180 | 6,43E-03 | | Cryptogenic Organizing Pneumonia | C08.381.483.487.249, C08.381.495.146.135.140.200, C08.127.446.135.140.200 | 6,48E-03 | | Periapical Diseases | C07.320.830, C07.465.714.306 | 6,49E-03 | | Enteritis | C06.405.469.326, C06.405.205.462 | 6,51E-03 | | Asthma | C08.674.095, C08.127.108 | 6,55E-03 | | Urogenital Neoplasms | C04.588.945 | 6,55E-03 | | Autoimmune Diseases | C20.111 | 6,63E-03 | | Chondrosarcoma | C04.557.450.565.280, C04.557.450.795.300 | 6,70E-03 | | Chest Pain | C23.888.646.215 | 6,71E-03 | | Lyme Neuroborreliosis | C01.252.400.825.480.700, C01.252.400.155.569.600, C10.228.228.180.437, C01.252.200.450, C01.252.847.193.569.600 | 6,75E-03 | | Obstetric Labor, Premature | C13.703.420.491 | 6,83E-03 | | Pneumonia, Pneumococcal | C08.381.677.540.550, C01.252.620.550, C01.252.410.890.670.750, C08.730.610.540.550 | 6,86E-03 | | Male Urogenital Diseases | C12 | 6,87E-03 | | Arterial Occlusive Diseases | C14.907.137 | 6,90E-03 | | Conjunctivitis, Allergic | C11.187.183.200, C20.543.480.200 | 6,99E-03 | | Tick-Borne Diseases | C01.252.400.825 | 6,99E-03 | | Sarcoma, Kaposi | C04.557.645.750, C04.557.450.795.850, C02.256.466.860 | 7,03E-03 | | Mastocytosis | C04.557.450.565.465 | 7,03E-03 | | Neurocysticercosis | C03.335.190.902.185.550, C03.105.250.550, C10.228.228.205.250.550 | 7,03E-03 | | Hernia | C23.300.707 | 7,04E-03 | | Odontogenic Cysts | C07.320.450.670, C05.500.470.690, C04.182.089.530.690 | 7,05E-03 | | Ovarian Neoplasms | C19.344.410, C04.588.322.455 | 7,05E-03 | | Rhabditida Infections | C03.335.508.700.700 | 7,17E-03 | | Strongyloidiasis | C03.335.508.700.700.799 | 7,17E-03 | | Spondylitis, Ankylosing | C05.116.900.853.625.800.850, C05.550.069.680, C05.550.114.865.800.850 | 7,20E-03 | | Enterocolitis, Necrotizing | C06.405.205.596.700, C06.405.469.363.700 | 7,24E-03 | | Orbital Diseases | C11.675 | 7,26E-03 | | Pleural Diseases | C08.528 | 7,28E-03 | | Animal Diseases | C22 | 7,35E-03 | | Measles | C02.782.580.600.500.500 | 7,44E-03 | | Leukoencephalopathies | C10.228.140.695 | 7,45E-03 | | Bovine Virus Diarrhea-Mucosal Disease | C22.196.106, C02.782.350.675.106 | 7,46E-03 | | Environmental Illness | C21.223, C20.543.312 | 7,46E-03 | | Pregnancy, Tubal | C13.703.733.703 | 7,46E-03 | | Jaw Cysts | C05.500.470, C04.182.089.530, C07.320.450 | 7,58E-03 | | Diabetic Angiopathies | C14.907.320, C19.246.099.500 | 7,59E-03 | | Trachoma | C01.539.375.354.220.800, C01.252.354.225.800, C11.294.354.220.800, C01.252.400.210.210.800, C11.187.183.220.889, C11.204.813 | 7,61E-03 | | Lymphocytic Choriomeningitis | C10.228.228.507.700.500, C02.587.580, C02.182.550.500, C10.228.228.210.500.500, C02.782.082.580 | 7,64E-03 | | Pulmonary Eosinophilia | C08.381.750, C15.378.553.231.549.750 | 7,71E-03 | | Acute Pain | C10.597.617.088, C23.888.646.115 | 7,76E-03 | | Sleep-Wake Transition Disorders | C10.886.659.700 | 7,88E-03 | | Entropion | C11.338.443 | 7,88E-03 | | Pouchitis | C06.405.469.420.520.500, C06.405.469.326.875.500, C06.405.205.462.624.500 | 7,91E-03 | | Colic | C23.888.821.030.500, C23.888.646.100.600 | 7,91E-03 | | Xerostomia | C07.465.815.929 | 7,91E-03 | | Diabetic Retinopathy | C14.907.320.382, C19.246.099.500.382, C11.768.257 | 7,98E-03 | | Heart Valve Diseases | C14.280.484 | 8,02E-03 | | Ovarian Neoplasms | C13.351.937.418.685, C19.391.630.705, C13.351.500.056.630.705 | 8,04E-03 | | Dyspnea | C08.618.326, C23.888.852.371 | 8,12E-03 | | Bronchiolitis Obliterans | C08.127.446.135.140, C08.381.495.146.135.140 | 8,33E-03 | | Hypertrophy | C23.300.775 | 8,37E-03 | | Malaria, Cerebral | C03.105.300.500, C10.228.228.205.300.500, C03.752.530.620, C03.752.530.650.675 | 8,48E-03 | | Hookworm Infections | C03.335.508.700.775.455 | 8,51E-03 | | Abortion, Spontaneous | C13.703.039 | 8,56E-03 | | Blood Protein Disorders | C15.378.147 | 8,61E-03 | | Picornaviridae Infections | C02.782.687 | 8,71E-03 | | Muscular Dystrophy, Duchenne | C16.320.577.300, C05.651.534.500.300, C10.668.491.175.500.300, C16.320.322.562 | 8,72E-03 | | Retinitis | C11.768.773 | 8,77E-03 | | Opportunistic Infections | C01.539.597, C02.597, C03.684 | 8,82E-03 | | Dermatomycoses | C17.800.838.208, C01.539.800.200, C01.703.295 | 8,82E-03 | | Hernia, Abdominal | C23.300.707.374 | 8,84E-03 | | Carcinoma, Renal Cell | C12.758.820.750.160, C12.777.419.473.160, C13.351.937.820.535.160, C04.557.470.200.025.390, C13.351.968.419.473.160, C04.588.945.947.535.160 | 8,85E-03 | | Ankylosis | C05.550.069 | 8,86E-03 | | Leukemia, Lymphoid | C04.557.337.428, C20.683.515.528, C15.604.515.560 | 8,92E-03 | | Bronchiolitis, Viral | C02.109, C08.127.446.135.321, C08.381.495.146.135.321, C08.730.099.135.321 | 8,98E-03 | | Toxoplasmosis, Animal | C03.701.688.817, C22.674.710.817, C03.752.625.817, C03.752.250.800.110 | 9,06E-03 | | Thoracic Neoplasms | C04.588.894 | 9,23E-03 | | Intellectual Disability | C10.597.606.643 | 9,26E-03 | | Liver Cirrhosis | C06.552.630 | 9,28E-03 | | RNA Virus Infections | C02.782 | 9,29E-03 | | Superinfection | C03.684.880, C01.539.597.880, C02.597.880 | 9,30E-03 | | Disorders of Environmental Origin | C21 | 9,30E-03 | | Prostatic Neoplasms | C04.588.945.440.770, C12.294.260.750, C12.294.565.625, C12.758.409.750 | 9,31E-03 | | Pneumococcal Infections | C01.252.410.890.670 | 9,36E-03 | | Neoplasms by Histologic Type | C04.557 | 9,43E-03 | | Eye Infections, Viral | C11.294.800, C02.325 | 9,44E-03 | | Fractures, Bone | C26.404 | 9,46E-03 | | Subacute Sclerosing Panencephalitis | C10.228.228.210.150.300.600, C02.290.700, C10.228.228.245.340.700, C02.782.580.600.500.500.800, C02.182.500.300.600, C02.839.862 | 9,46E-03 | | Central Nervous System Helminthiasis | C10.228.228.205.250, C03.105.250 | 9,46E-03 | | Diabetes Mellitus | C19.246 | 9,50E-03 | | Inflammatory Bowel Diseases | C06.405.469.432, C06.405.205.731 | 9,56E-03 | | Purpura | C15.378.100.802, C23.888.885.687, C23.550.414.950 | 9,71E-03 | | Respiratory Tract Neoplasms | C08.785 | 9,80E-03 | | Intervertebral Disc Displacement | C23.300.707.952, C05.116.900.307 | 9,83E-03 | | Lyme Disease | C01.252.400.825.480, C01.252.400.155.569, C01.252.847.193.569 | 9,91E-03 | |
| --- | --- | --- | --- | --- | --- | --- | --- | --- | --- | --- | --- | --- | --- | --- | --- | --- | --- | --- | --- | --- | --- | --- | --- | --- | --- | --- | --- | --- | --- | --- | --- | --- | --- | --- | --- | --- | --- | --- | --- | --- | --- | --- | --- | --- | --- | --- | --- | --- | --- | --- | --- | --- | --- | --- | --- | --- | --- | --- | --- | --- | --- | --- | --- | --- | --- | --- | --- | --- | --- | --- | --- | --- | --- | --- | --- | --- | --- | --- | --- | --- | --- | --- | --- | --- | --- | --- | --- | --- | --- | --- | --- | --- | --- | --- | --- | --- | --- | --- | --- | --- | --- | --- | --- | --- | --- | --- | --- | --- | --- | --- | --- | --- | --- | --- | --- | --- | --- | --- | --- | --- | --- | --- | --- | --- | --- | --- | --- | --- | --- | --- | --- | --- | --- | --- | --- | --- | --- | --- | --- | --- | --- | --- | --- | --- | --- | --- | --- | --- | --- | --- | --- | --- | --- | --- | --- | --- | --- | --- | --- | --- | --- | --- | --- | --- | --- | --- | --- | --- | --- | --- | --- | --- | --- | --- | --- | --- | --- | --- | --- | --- | --- | --- | --- | --- | --- | --- | --- | --- | --- | --- | --- | --- | --- | --- | --- | --- | --- | --- | --- | --- | --- | --- | --- | --- | --- | --- | --- | --- | --- | --- | --- | --- | --- | --- | --- | --- | --- | --- | --- | --- | --- | --- | --- | --- | --- | --- | --- | --- | --- | --- | --- | --- | --- | --- | --- | --- | --- | --- | --- | --- | --- | --- | --- | --- | --- | --- | --- | --- | --- | --- | --- | --- | --- | --- | --- | --- | --- | --- | --- | --- | --- | --- | --- | --- | --- | --- | --- | --- | --- | --- | --- | --- | --- | --- | --- | --- | --- | --- | --- | --- | --- | --- | --- | --- | --- | --- | --- | --- | --- | --- | --- | --- | --- | --- | --- | --- | --- | --- | --- | --- | --- | --- | --- | --- | --- | --- | --- | --- | --- | --- | --- | --- | --- | --- | --- | --- | --- | --- | --- | --- | --- | --- | --- | --- | --- | --- | --- | --- | --- | --- | --- | --- | --- | --- | --- | --- | --- | --- | --- | --- | --- | --- | --- | --- | --- | --- | --- | --- | --- | --- | --- | --- | --- | --- | --- | --- | --- | --- | --- | --- | --- | --- | --- | --- | --- | --- | --- | --- | --- | --- | --- | --- | --- | --- | --- | --- | --- | --- | --- | --- | --- | --- | --- | --- | --- | --- | --- | --- | --- | --- | --- | --- | --- | --- | --- | --- | --- | --- | --- | --- | --- | --- | --- | --- | --- | --- | --- | --- | --- | --- | --- | --- | --- | --- | --- | --- | --- | --- | --- | --- | --- | --- | --- | --- | --- | --- | --- | --- | --- | --- | --- | --- | --- | --- | --- | --- | --- | --- | --- | --- | --- | --- | --- | --- | --- | --- | --- | --- | --- | --- | --- | --- | --- | --- | --- | --- | --- | --- | --- | --- | --- | --- | --- | --- | --- | --- | --- | --- | --- | --- | --- | --- | --- | --- | --- | --- | --- | --- | --- | --- | --- | --- | --- | --- | --- | --- | --- | --- | --- | --- | --- | --- | --- | --- | --- | --- | --- | --- | --- | --- | --- | --- | --- | --- | --- | --- | --- | --- | --- | --- | --- | --- | --- | --- | --- | --- | --- | --- | --- | --- | --- | --- | --- | --- | --- | --- | --- | --- | --- | --- | --- | --- | --- | --- | --- | --- | --- | --- | --- | --- | --- | --- | --- | --- | --- | --- | --- | --- | --- | --- | --- | --- | --- | --- | --- | --- | --- | --- | --- | --- | --- | --- | --- | --- | --- | --- | --- | --- | --- | --- | --- | --- | --- | --- | --- | --- | --- | --- | --- | --- | --- | --- | --- | --- | --- | --- | --- | --- | --- | --- | --- | --- | --- | --- | --- | --- | --- | --- | --- | --- | --- | --- | --- | --- | --- | --- | --- | --- | --- | --- | --- | --- | --- | --- | --- | --- | --- | --- | --- | --- | --- | --- | --- | --- | --- | --- | --- | --- | --- | --- | --- | --- | --- | --- | --- | --- | --- | --- | --- | --- | --- | --- | --- | --- | --- | --- | --- | --- | --- | --- | --- | --- | --- | --- | --- | --- | --- | --- | --- | --- | --- | --- | --- | --- | --- | --- | --- | --- | --- | --- | --- | --- | --- | --- | --- | --- | --- | --- | --- | --- | --- | --- | --- | --- | --- | --- | --- | --- | --- | --- | --- | --- | --- | --- | --- | --- | --- | --- | --- | --- | --- | --- | --- | --- | --- | --- | --- | --- | --- | --- | --- | --- | --- | --- | --- | --- | --- | --- | --- | --- | --- | --- | --- | --- | --- | --- | --- | --- | --- | --- | --- | --- | --- | --- | --- | --- | --- | --- | --- | --- | --- | --- | --- | --- | --- | --- | --- | --- | --- | --- | --- | --- | --- | --- | --- | --- | --- | --- | --- | --- | --- | --- | --- | --- | --- | --- | --- | --- | --- | --- | --- | --- | --- | --- | --- | --- | --- | --- | --- | --- | --- | --- | --- | --- | --- | --- | --- | --- | --- | --- | --- | --- | --- | --- | --- | --- | --- | --- | --- | --- | --- | --- | --- | --- | --- | --- | --- | --- | --- | --- | --- | --- | --- | --- | --- | --- | --- | --- | --- | --- | --- | --- | --- | --- | --- | --- | --- | --- | --- | --- | --- | --- | --- | --- | --- | --- | --- | --- | --- | --- | --- | --- | --- | --- | --- | --- | --- | --- | --- | --- | --- | --- | --- | --- | --- | --- | --- | --- | --- | --- | --- | --- | --- | --- | --- | --- | --- | --- | --- | --- | --- | --- | --- | --- | --- | --- | --- | --- | --- | --- | --- | --- | --- | --- | --- | --- | --- | --- | --- | --- | --- | --- | --- | --- | --- | --- | --- | --- | --- | --- | --- | --- | --- | --- | --- | --- | --- | --- | --- | --- | --- | --- | --- | --- | --- | --- | --- | --- | --- | --- | --- | --- | --- | --- | --- | --- | --- | --- | --- | --- | --- | --- | --- | --- | --- | --- | --- | --- | --- | --- | --- | --- | --- | --- | --- | --- | --- | --- | --- | --- | --- | --- | --- | --- | --- | --- | --- | --- | --- | --- | --- | --- | --- | --- | --- | --- | --- | --- | --- | --- | --- | --- | --- | --- | --- | --- | --- | --- | --- | --- | --- | --- | --- | --- | --- | --- | --- | --- | --- | --- | --- | --- | --- | --- | --- | --- | --- | --- | --- | --- | --- | --- | --- | --- | --- | --- | --- | --- | --- | --- | --- | --- | --- | --- | --- | --- | --- | --- | --- | --- | --- | --- | --- | --- | --- | --- | --- | --- | --- | --- | --- | --- | --- | --- | --- | --- | --- | --- | --- | --- | --- | --- | --- | --- | --- | --- | --- | --- | --- | --- | --- | --- | --- | --- | --- | --- | --- | --- | --- | --- | --- | --- | --- | --- | --- | --- | --- | --- | --- | --- | --- | --- | --- | --- | --- | --- | --- | --- | --- | --- | --- | --- | --- | --- | --- | --- | --- | --- | --- | --- | --- | --- | --- | --- | --- | --- | --- | --- | --- | --- | --- | --- | --- | --- | --- | --- | --- | --- | --- | --- | --- | --- | --- | --- | --- | --- | --- | --- | --- | --- | --- | --- | --- | --- | --- | --- | --- | --- | --- | --- | --- | --- | --- | --- | --- | --- | --- | --- | --- | --- | --- | --- | --- | --- | --- | --- | --- | --- | --- | --- | --- | --- | --- | --- | --- | --- | --- | --- | --- | --- | --- | --- | --- | --- | --- | --- | --- | --- | --- | --- | --- | --- | --- | --- | --- | --- | --- | --- | --- | --- | --- | --- | --- | --- | --- | --- | --- | --- | --- | --- | --- | --- | --- | --- | --- | --- | --- | --- | --- | --- | --- | --- | --- | --- | --- | --- | --- | --- | --- | --- | --- | --- | --- | --- | --- | --- | --- | --- | --- | --- | --- | --- | --- | --- | --- | --- | --- | --- | --- | --- | --- | --- | --- | --- | --- | --- | --- | --- | --- | --- | --- | --- | --- | --- | --- | --- | --- | --- | --- | --- | --- | --- | --- | --- | --- | --- | --- | --- | --- | --- | --- | --- | --- | --- | --- | --- | --- | --- | --- | --- | --- | --- | --- | --- | --- | --- | --- | --- | --- | --- | --- | --- | --- | --- | --- | --- | --- | --- | --- | --- |
